# Supplementary material for: Effect of the Nanoparticle Exposures on the Tomato Bacterial Wilt Disease Control by Modulating the Rhizosphere Bacterial Community
Source: MDPI journal article supplement (doi:10.3390/ijms23010414), 2021-12-30
Supplement: s1 [file s1]

## Supplementary data

**Table S1.** Zeta potential (mV) and hydrodynamic diameter of three metal oxide nanoparticle (FeO, CuO and ZnO) suspensions in water.

| Analysis                         | FeONPs      | CuONPs     | ZnONPs      |
|----------------------------------|-------------|------------|-------------|
| Zeta potential <sup>a</sup> (mV) | -38.9±0.70  | -26.6±0.72 | -24.2±0.10  |
| hydrodynamic diameter (nm)       | 145.07±1.16 | 95.9±0.26  | 357.20±0.36 |

**Table S2.** Properties of the co-occurrence networks of the bacterial community in rhizosphere soil in the control group and three metal oxide nanoparticle (CuO, FeO and ZnO) group.

| Network properties | Second Week |       |       |       | Fourth Week |       |       |       |
|--------------------|-------------|-------|-------|-------|-------------|-------|-------|-------|
|                    | CK          | CuO   | FeO   | ZnO   | CK          | CuO   | FeO   | ZnO   |
| Number of edges    | 305         | 384   | 226   | 244   | 115         | 117   | 116   | 384   |
| Number of nodes    | 105         | 143   | 135   | 125   | 96          | 85    | 100   | 143   |
| Modularity         | 0.822       | 0.839 | 0.935 | 0.873 | 0.905       | 0.91  | 0.948 | 0.822 |
| Average degree     | 5.81        | 6.371 | 3.348 | 3.904 | 2.396       | 2.753 | 2.32  | 2.083 |
| Positive edges     | 168         | 231   | 125   | 166   | 62          | 61    | 61    | 58    |
| Negative edges     | 137         | 153   | 101   | 78    | 53          | 56    | 55    | 42    |

Correlations between bacteria were obtained by the “hmisc” package in R. Spearman’s  $r > 0.7$  and  $< -0.7$  with a  $p\text{-value} < 0.01$  represented positive and negative correlations, respectively. Other properties of the network were all calculated in Gephi.

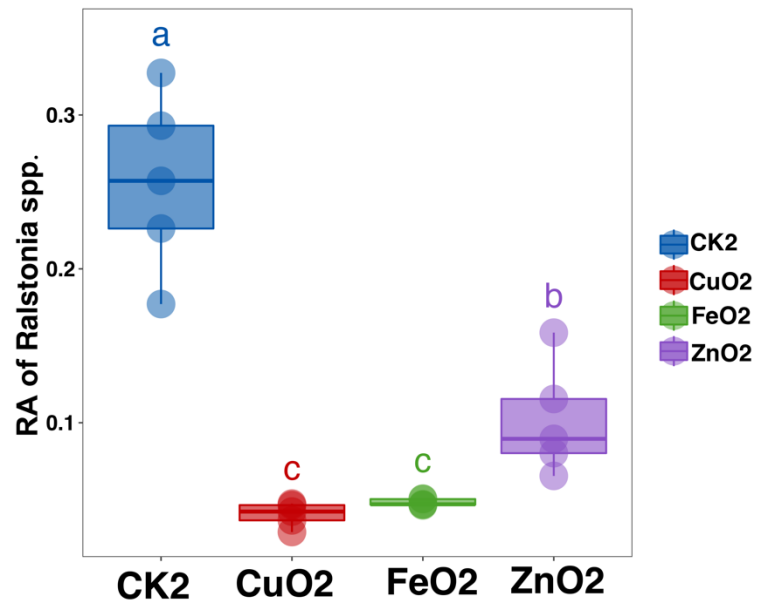

**Figure S1.** Boxplot of relative abundance of *Ralstonia* spp. Abbreviation: 2nd week of nanoparticles treatment (CK2, CuO2, ZnO2 and FeO2)
